# Supplementary material for: Time-Dependent Protective and Pro-Resolving Effects of FPR2 Agonists on Lipopolysaccharide-Exposed Microglia Cells Involve Inhibition of NF-κB and MAPKs Pathways
Source: MDPI journal article supplement (doi:10.3390/cells10092373), 2021-09-09
Supplement: s1 [file s1]

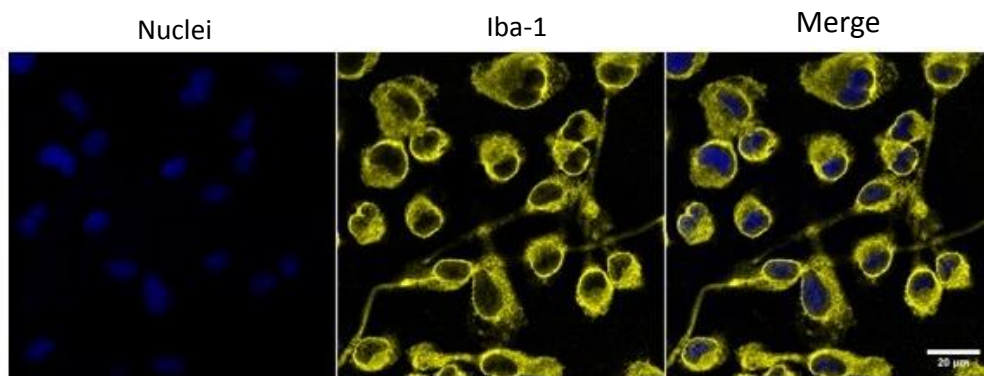

Figure S1. Representative fluorescence images of microglia cells acquired by confocal microscopy. Nuclei appear in blue and Iba-1 in yellow. Scale bar: 20  $\mu\text{m}$  is located in the bottom right corner of each image.
